# Supplementary material for: Mononuclear and dinuclear Re(i) complexes incorporating 1-(2-pyridylazo)-2-naphthol: synthesis, structure, spectral, DFT and TDDFT studies
Source: Royal Society of Chemistry journal article supplement (doi:10.1039/c2dt31774e), 2012-10-15
Supplement: c2dt31774e.pdf [file c2dt31774e.pdf]

**Dalton Transactions (Revised)**

**Manuscript ID: DT-ART-08-2012-031774**

*Electronic Supplementary Information*

**Mononuclear and dinuclear Re(I) complexes incorporating 1-(2-pyridylazo)-2-naphthol: synthesis, structure, spectral, DFT and TDDFT study<sup>†</sup>**

**Pallab Mondal, Amar Hens, Sucharita Basak, and Kajal Krishna Rajak<sup>\*</sup>**

Inorganic Chemistry Section, Department of Chemistry, Jadavpur University, Kolkata, 700 032, India

<sup>\*</sup> To whom correspondence should be addressed. Email: [kajalrajak@hotmail.com](mailto:kajalrajak@hotmail.com)

Jadavpur University

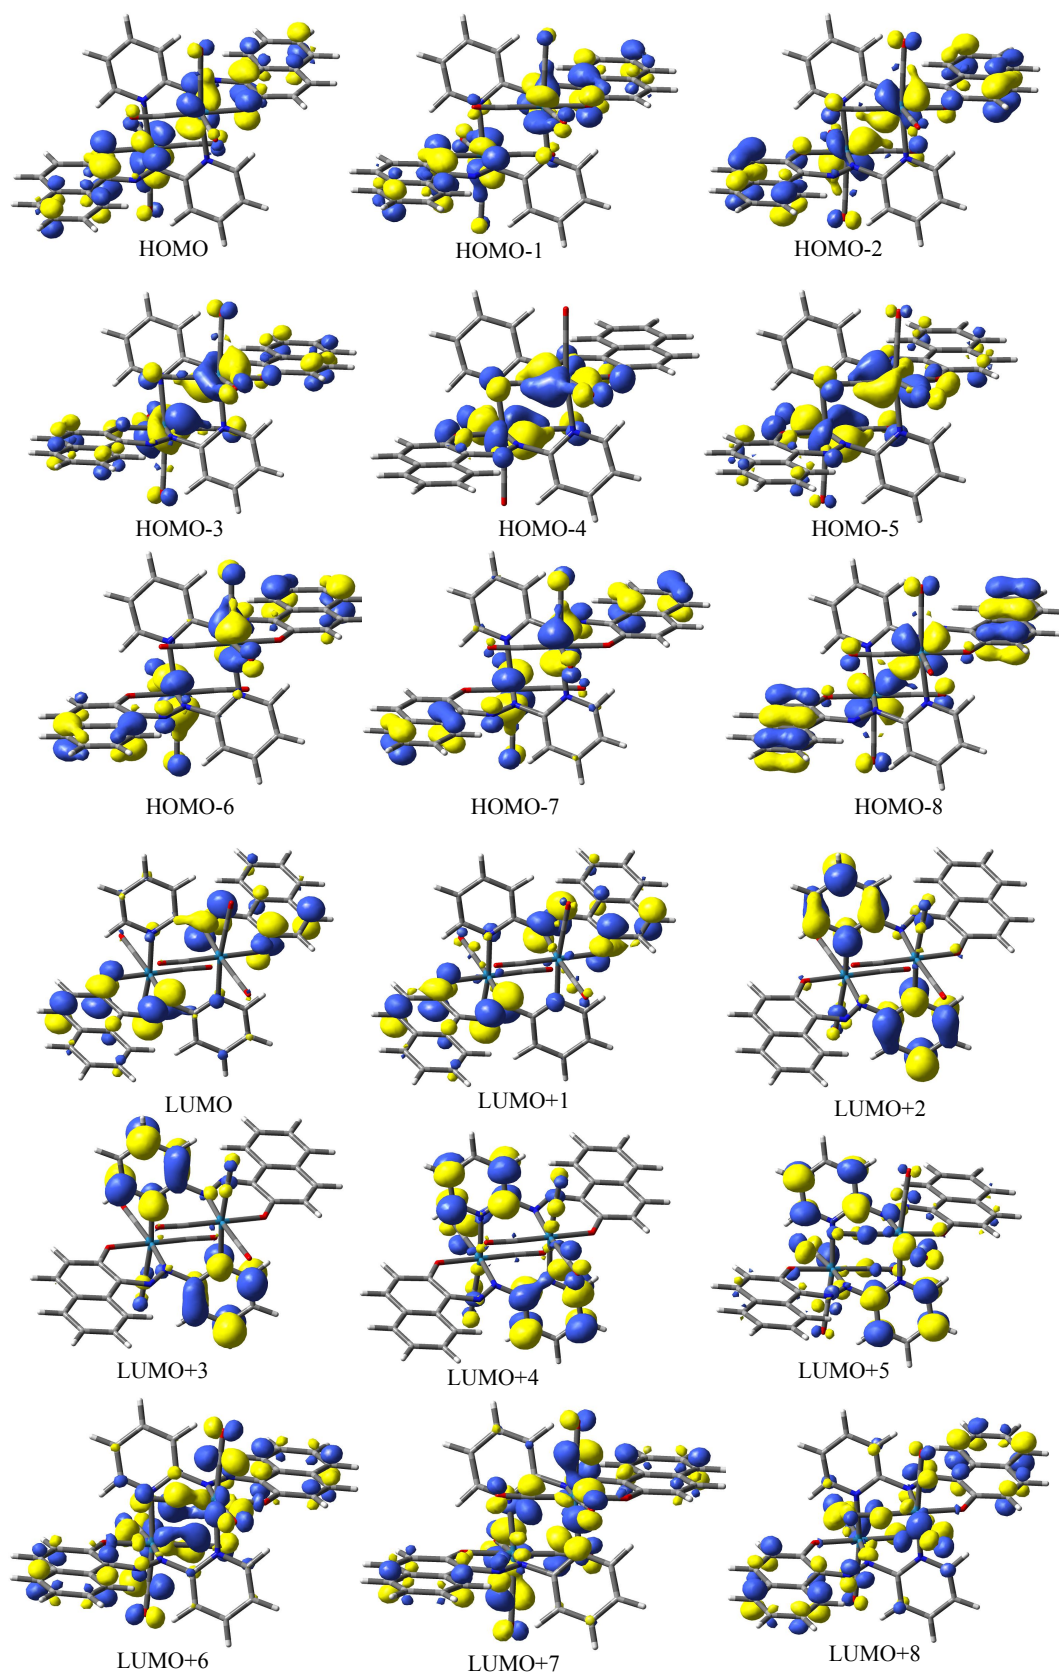

**Fig. S1** Isodensity plot of frontier orbitals of  $[\text{Re}_2(\text{PAN})_2(\text{CO})_6]$ , **2**.

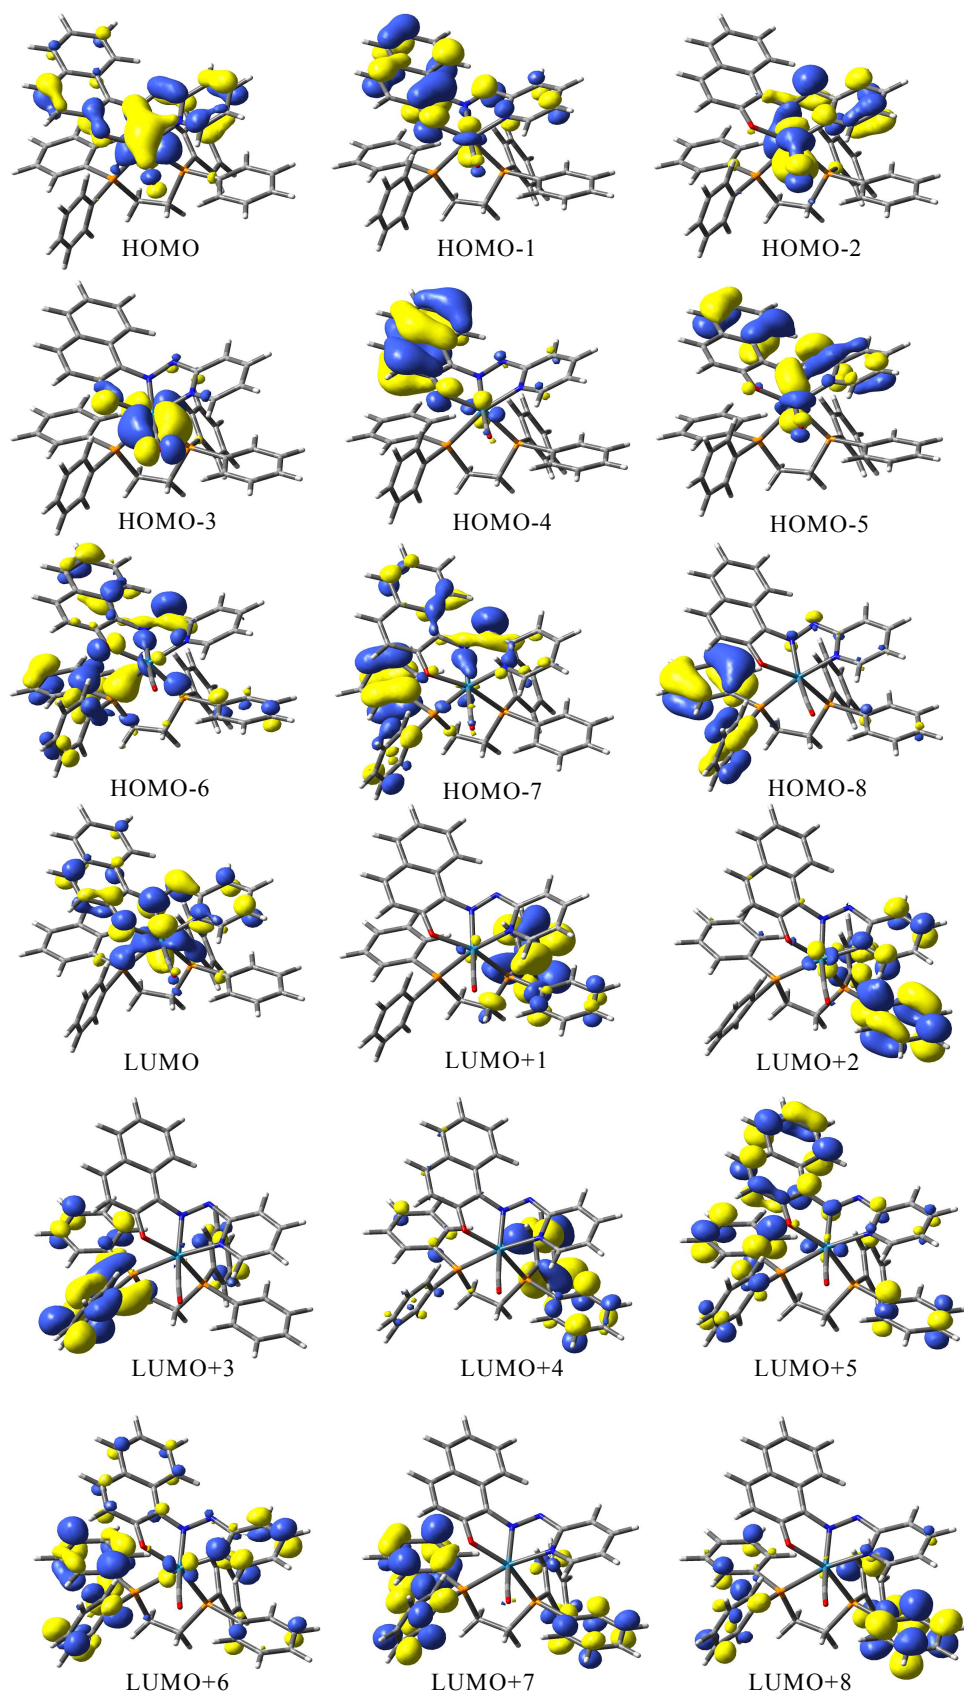

**Fig. S2** Isodensity plot of frontier orbitals of  $[\text{Re}(\text{PAN})(\text{CO})(\text{P}-\text{P})]$ , **3**.

**Table S1** Frontier Molecular Orbital Composition (%) in the Ground State for  $[\text{Re}_2(\text{PAN})_2(\text{CO})_6]$ , **2**.

| Orbital | Energy<br>(eV) | Contribution (%) |      |      | Main bond type                     |
|---------|----------------|------------------|------|------|------------------------------------|
|         |                | Re               | CO   | PAN  |                                    |
| L+8     | -0.851         | 10.4             | 36.0 | 53.6 | p(Re)+ $\pi^*$ (CO)+ $\pi^*$ (PAN) |
| L+7     | -0.906         | 15.1             | 44.7 | 40.1 | p(Re)+ $\pi^*$ (CO)+ $\pi^*$ (PAN) |
| L+6     | -0.976         | 16.2             | 45.0 | 38.8 | p(Re)+ $\pi^*$ (CO)+ $\pi^*$ (PAN) |
| L+5     | -1.181         | 8.0              | 23.4 | 68.6 | $\pi^*$ (CO)+ $\pi^*$ (PAN)        |
| L+4     | -1.202         | 9.1              | 20.4 | 70.5 | $\pi^*$ (CO)+ $\pi^*$ (PAN)        |
| L+3     | -1.721         | 3.3              | 7.0  | 89.7 | $\pi^*$ (PAN)                      |
| L+2     | -1.772         | 3.6              | 6.7  | 89.7 | $\pi^*$ (PAN)                      |
| L+1     | -2.717         | 3.0              | 5.5  | 91.5 | $\pi^*$ (PAN)                      |
| L       | -2.851         | 1.3              | 3.4  | 95.3 | $\pi^*$ (PAN)                      |
| H       | -5.687         | 20.6             | 10.4 | 69.0 | d(Re)+ $\pi$ (CO)+ $\pi$ (PAN)     |
| H-1     | -5.768         | 20.0             | 12.0 | 68.0 | d(Re)+ $\pi$ (CO)+ $\pi$ (PAN)     |
| H-2     | -6.254         | 30.7             | 14.1 | 55.2 | d(Re)+ $\pi$ (CO)+ $\pi$ (PAN)     |
| H-3     | -6.274         | 43.4             | 21.6 | 35.0 | d(Re)+ $\pi$ (CO)+ $\pi$ (PAN)     |
| H-4     | -6.316         | 53.8             | 24.7 | 21.4 | d(Re)+ $\pi$ (CO)+ $\pi$ (PAN)     |
| H-5     | -6.342         | 48.1             | 21.8 | 30.1 | d(Re)+ $\pi$ (CO)+ $\pi$ (PAN)     |
| H-6     | -6.663         | 36.9             | 15.0 | 48.1 | d(Re)+ $\pi$ (CO)+ $\pi$ (PAN)     |
| H-7     | -6.724         | 37.2             | 14.0 | 48.7 | d(Re)+ $\pi$ (CO)+ $\pi$ (PAN)     |
| H-8     | -6.812         | 31.2             | 12.7 | 56.0 | d(Re)+ $\pi$ (CO)+ $\pi$ (PAN)     |

**Table S2** Frontier Molecular Orbital Composition (%) in the Ground State for [Re(PAN)(CO)(P-P)], **3**.

| Orbital | Energy (eV) | Contribution (%) |      |      |       | Main bond type                      |
|---------|-------------|------------------|------|------|-------|-------------------------------------|
|         |             | Re               | CO   | PAN  | (P-P) |                                     |
| L+8     | -0.590      | 1.6              | 0.3  | 6.0  | 92.1  | $\pi^*$ (P-P)                       |
| L+7     | -0.633      | 1.1              | 0.8  | 3.5  | 94.6  | $\pi^*$ (P-P)                       |
| L+6     | -0.798      | 4.0              | 0.2  | 30.3 | 65.5  | $\pi^*$ (PAN)+ $\pi^*$ (P-P)        |
| L+5     | -0.832      | 3.3              | 0.4  | 44.0 | 52.2  | $\pi^*$ (PAN)+ $\pi^*$ (P-P)        |
| L+4     | -0.876      | 1.1              | 0.1  | 6.0  | 92.8  | $\pi^*$ (P-P)                       |
| L+3     | -0.946      | 0.7              | 0    | 2.3  | 97.0  | $\pi^*$ (P-P)                       |
| L+2     | -1.102      | 5.5              | 0.6  | 24.8 | 69.1  | $\pi^*$ (PAN)+ $\pi^*$ (P-P)        |
| L+1     | -1.245      | 1.6              | 0.4  | 3.5  | 94.4  | $\pi^*$ (P-P)                       |
| L       | -2.042      | 28.5             | 1.4  | 57.5 | 12.6  | p(Re)+ $\pi^*$ (PAN)+ $\pi^*$ (P-P) |
| H       | -4.878      | 37.3             | 4.7  | 52.9 | 5.1   | d(Re)+ $\pi$ (PAN)                  |
| H-1     | -5.264      | 8.2              | 1.6  | 87.6 | 2.6   | $\pi$ (PAN)                         |
| H-2     | -5.399      | 39.2             | 11.8 | 41.8 | 7.1   | d(Re)+ $\pi$ (CO)+ $\pi$ (PAN)      |
| H-3     | -5.647      | 69.0             | 18.5 | 9.2  | 3.3   | d(Re)+ $\pi$ (CO)                   |
| H-4     | -6.191      | 5.0              | 0.5  | 92.1 | 2.3   | $\pi$ (PAN)                         |
| H-5     | -6.769      | 15.3             | 2.7  | 80.0 | 2.0   | d(Re)+ $\pi$ (PAN)                  |
| H-6     | -6.942      | 5.4              | 0.8  | 39.0 | 54.8  | $\pi$ (PAN)+ $\pi$ (P-P)            |
| H-7     | -7.107      | 3.7              | 1.1  | 41.7 | 53.4  | $\pi$ (PAN)+ $\pi$ (P-P)            |
| H-8     | -7.143      | 0.8              | 0.4  | 7.0  | 91.8  | $\pi$ (P-P)                         |
| L+8     | -0.590      | 1.6              | 0.3  | 6.0  | 92.1  | $\pi^*$ (P-P)                       |

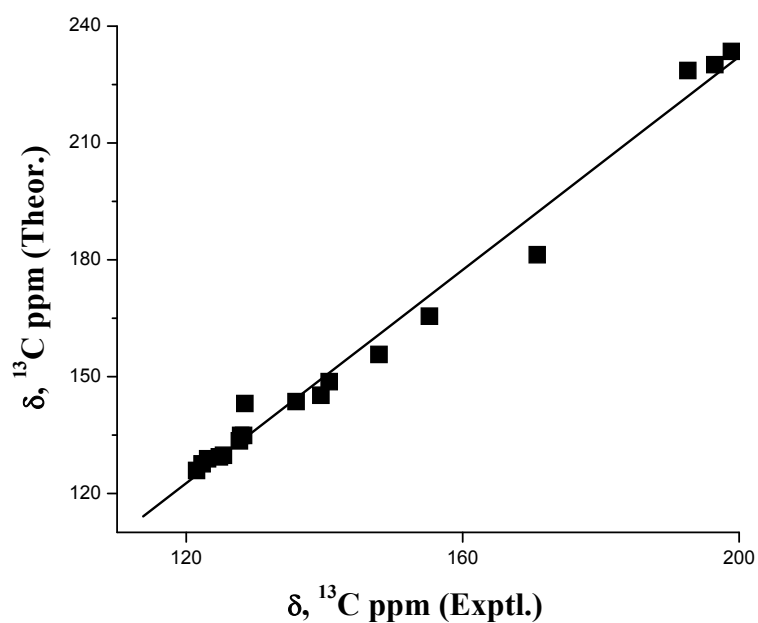

**Fig. S3** Linear correlation between the experimental and calculated  $^{13}\text{C}$  NMR chemical shifts of  $[\text{Re}_2(\text{PAN})_2(\text{CO})_6]$ , **2**.

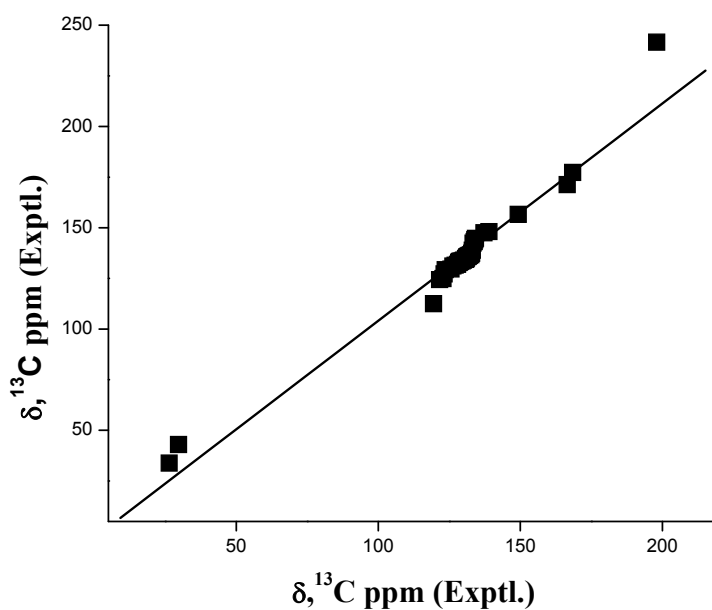

**Fig. S4** Linear correlation between the experimental and calculated  $^{13}\text{C}$  NMR chemical shifts of  $[\text{Re}(\text{PAN})(\text{CO})(\text{P-P})]$ , **3**.

**Table S3** Main calculated optical transition for the complex  $[\text{Re}_2(\text{PAN})_2(\text{CO})_6]$ , **2** with composition in terms of molecular orbital contribution of the transition, Vertical excitation energies, oscillator strength in acetonitrile

| Excitation | Composition                                                                                                      | E (eV) | Oscillator strength (f) | $\lambda_{\text{theo}}$ (nm) | Assign                                                                                                               | $\lambda_{\text{exp}}$ (nm) |
|------------|------------------------------------------------------------------------------------------------------------------|--------|-------------------------|------------------------------|----------------------------------------------------------------------------------------------------------------------|-----------------------------|
| 1          | H-1→L (100%)                                                                                                     | 2.4892 | 0.1749                  | 498.09                       | MLCT/ LLCT /ILCT                                                                                                     | 511                         |
| 2          | H→L+1 (100%)                                                                                                     | 2.5405 | 0.0676                  | 488.04                       | MLCT/ LLCT /ILCT                                                                                                     |                             |
| 3          | H-3→L+1 (23%)<br>H-2→L (77%)                                                                                     | 2.9337 | 0.5455                  | 422.62                       | MLCT/ LLCT /ILCT<br>MLCT/ LLCT /ILCT                                                                                 | 400                         |
| 4          | H-5→L+1 (45%)<br>H-4→L (34%)<br>H-3→L+1 (20%)                                                                    | 3.1253 | 0.0190                  | 396.72                       | MLCT/ LLCT /ILCT<br>MLCT/ LLCT /ILCT<br>MLCT/ LLCT /ILCT                                                             |                             |
| 5          | H-9→L (10%)<br>H-5→L+1 (14%)<br>H-4→L (12%)<br>H-3→L+1 (48%)<br>H-2→L (16%)                                      | 3.1455 | 0.0791                  | 394.17                       | MLCT/ LLCT /ILCT<br>MLCT/ LLCT /ILCT<br>MLCT/ LLCT /ILCT<br>MLCT/ LLCT /ILCT<br>MLCT/ LLCT /ILCT                     |                             |
| 6          | H-11→L (16%)<br>H-10→L+1 (12%)<br>H-8→L+1 (17%)<br>H-7→L (37%)<br>H-6→L+1 (17%)                                  | 3.3822 | 0.0567                  | 366.57                       | MLCT/ILCT<br>ILCT<br>MLCT/ LLCT /ILCT<br>MLCT/ LLCT /ILCT<br>MLCT/ LLCT /ILCT                                        |                             |
| 7          | H-8→L+1 (21%)<br>H-7→L (12%)<br>H-1→L+3 (67%)                                                                    | 3.6494 | 0.0399                  | 339.74                       | MLCT/ LLCT /ILCT<br>MLCT/ LLCT /ILCT<br>MLCT/ LLCT /ILCT                                                             | 313                         |
| 8          | H-11→L (8%)<br>H-9→L (28%)<br>H-8→L+1 (39%)<br>H-6→L+1 (8%)<br>H-1→L+3 (16%)                                     | 3.6642 | 0.0144                  | 338.36                       | MLCT/ILCT<br>MLCT/ LLCT /ILCT<br>MLCT/ LLCT /ILCT<br>MLCT/ LLCT /ILCT<br>MLCT/ LLCT /ILCT                            |                             |
| 9          | H-5→L+2 (13%)<br>H-4→L+3 (11%)<br>H-1→L+7 (9%)<br>H→L+5 (44%)<br>H→L+6 (22%)                                     | 3.9517 | 0.0670                  | 313.75                       | MLCT/ LLCT /ILCT<br>MLCT/ LLCT /ILCT<br>MLCT/ LLCT /ILCT<br>MLCT/ LLCT /ILCT<br>MLCT/ LLCT /ILCT                     |                             |
| 10         | H-5→L+2 (15%)<br>H-4→L+3 (10%)<br>H-3→L+2 (9%)<br>H-1→L+4 (29%)<br>H→L+5 (19%)<br>H→L+6 (17%)                    | 4.0725 | 0.0492                  | 304.45                       | MLCT/ LLCT /ILCT<br>MLCT/ LLCT /ILCT<br>MLCT/ LLCT /ILCT<br>MLCT/ LLCT /ILCT<br>MLCT/ LLCT /ILCT<br>MLCT/ LLCT /ILCT |                             |
| 11         | H-13→L (17%)<br>H-12→L (9%)<br>H-12→L+1 (11%)<br>H-4→L+3 (9%)<br>H-3→L+2 (18%)<br>H-2→L+3 (11%)<br>H-1→L+7 (24%) | 4.1794 | 0.0547                  | 296.65                       | ILCT<br>ILCT<br>ILCT<br>MLCT/ LLCT /ILCT<br>MLCT/ LLCT /ILCT<br>MLCT/ LLCT /ILCT<br>MLCT/ LLCT /ILCT                 |                             |

**Table S4** Main calculated optical transition for the complex [Re(PAN)(CO)(P-P)], **3** with composition in terms of molecular orbital contribution of the transition, Vertical excitation energies, oscillator strength in acetonitrile

| Excitation | Composition   | E (eV) | Oscillator strength (f) | $\lambda_{\text{theo}}$ (nm) | Assign         | $\lambda_{\text{exp}}$ (nm) |
|------------|---------------|--------|-------------------------|------------------------------|----------------|-----------------------------|
| 1          | H-3→L (13%)   | 2.6396 | 0.2023                  | 469.70                       | MLCT/LLCT      | 465                         |
|            | H-2→L (26%)   |        |                         |                              | MLCT/LLCT/ILCT |                             |
|            | H-1→L (26%)   |        |                         |                              | LMCT/ILCT      |                             |
|            | H→L (35%)     |        |                         |                              | MLCT/ILCT      |                             |
| 2          | H-2→L (38%)   | 2.8598 | 0.2298                  | 433.54                       | MLCT/LLCT/ILCT |                             |
|            | H-1→L (46%)   |        |                         |                              | LMCT/ILCT      |                             |
|            | H→L+1 (16%)   |        |                         |                              | MLCT/ILCT      |                             |
| 3          | H→L+1 (58%)   | 3.4318 | 0.0872                  | 361.28                       | MLCT/ILCT      | 366                         |
|            | H→L+3 (27%)   |        |                         |                              | MLCT/ILCT      |                             |
|            | H→L+5 (14%)   |        |                         |                              | MLCT/ILCT      |                             |
| 4          | H-4→L (12%)   | 3.5803 | 0.1163                  | 346.29                       | LMCT/ILCT      |                             |
|            | H→L+1 (21%)   |        |                         |                              | MLCT/ILCT      |                             |
|            | H→L+2 (15%)   |        |                         |                              | MLCT/ILCT      |                             |
|            | H→L+3 (40%)   |        |                         |                              | MLCT/ILCT      |                             |
|            | H→L+5 (11%)   |        |                         |                              | MLCT/ILCT      |                             |
| 5          | H-4→L (22%)   | 3.6087 | 0.0876                  | 343.57                       | LMCT/ILCT      |                             |
|            | H→L+2 (66%)   |        |                         |                              | MLCT/ILCT      |                             |
|            | H→L+3 (12%)   |        |                         |                              | MLCT/ILCT      |                             |
| 6          | H-4→L (51%)   | 3.6586 | 0.0765                  | 338.88                       | LMCT/ILCT      |                             |
|            | H→L+1 (12%)   |        |                         |                              | MLCT/ILCT      |                             |
|            | H→L+2 (15%)   |        |                         |                              | MLCT/ILCT      |                             |
|            | H→L+4 (12%)   |        |                         |                              | MLCT/ILCT      |                             |
|            | H→L+5 (9%)    |        |                         |                              | MLCT/ILCT      |                             |
| 7          | H-2→L+1 (11%) | 3.7684 | 0.0211                  | 329.01                       | MLCT/LLCT/ILCT |                             |
|            | H→L+4 (46%)   |        |                         |                              | MLCT/ILCT      |                             |
|            | H→L+5 (42%)   |        |                         |                              | MLCT/ILCT      |                             |



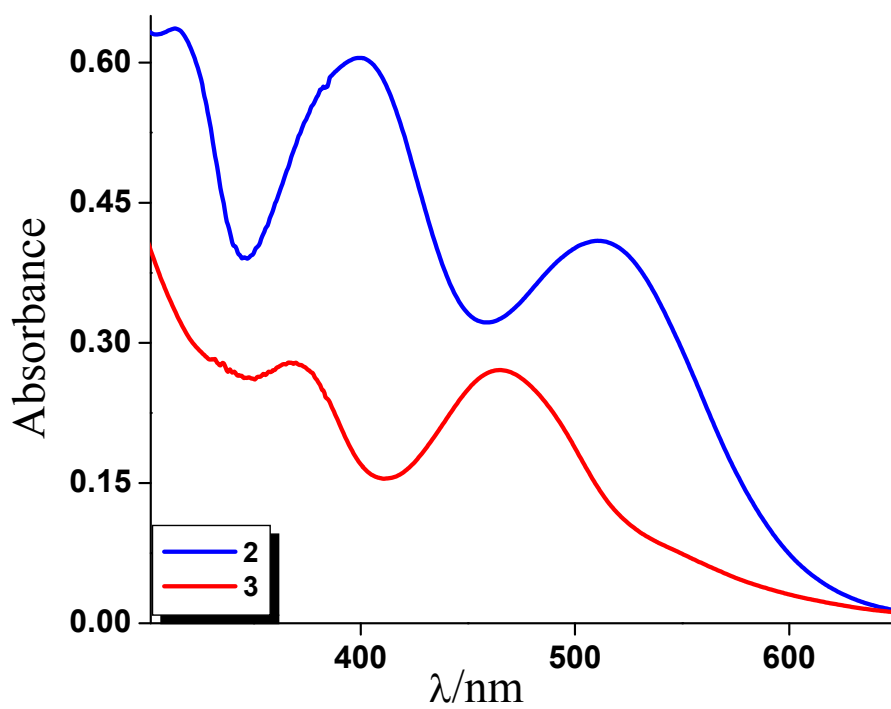

**Fig. S5** Experimental absorption spectra of **2** and **3** in acetonitrile media.

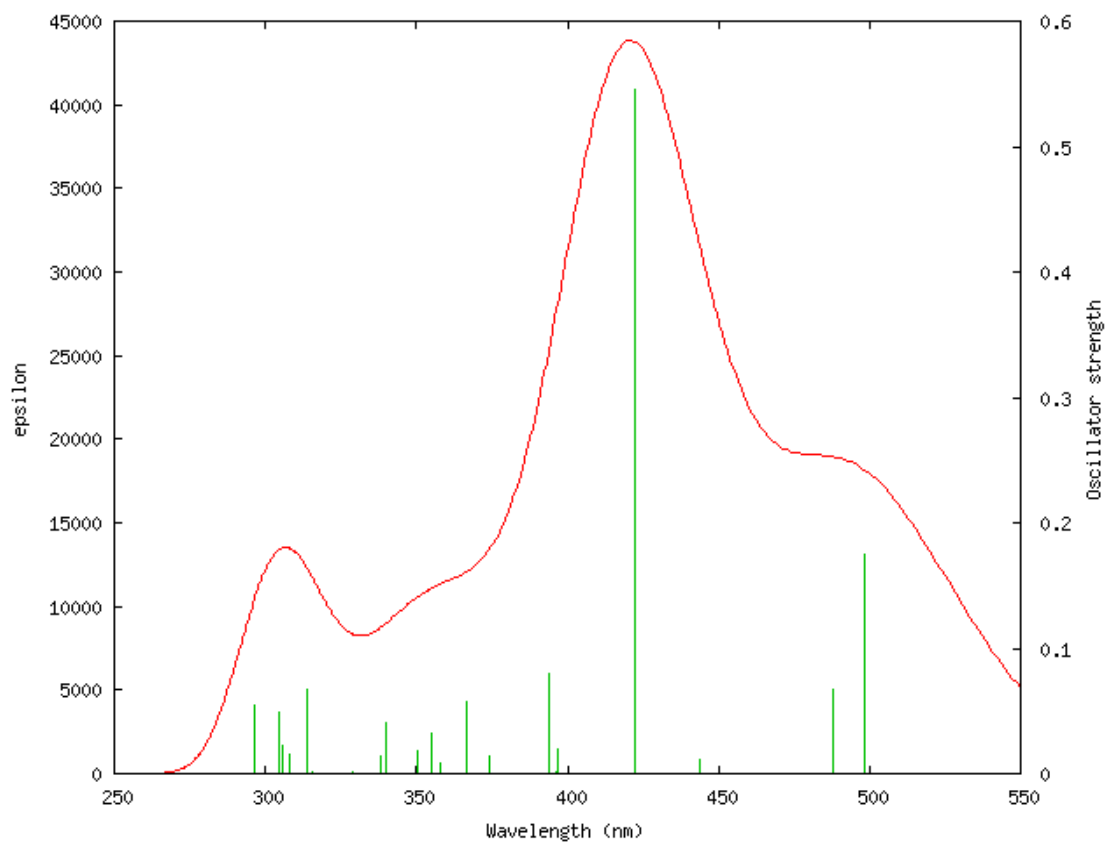

**Fig. S6** The simulated absorption spectra of complex  $[\text{Re}_2(\text{PAN})_2(\text{CO})_6]$ , **2** at the TDDFT (B3LYP)/LANL2DZ level in acetonitrile media.

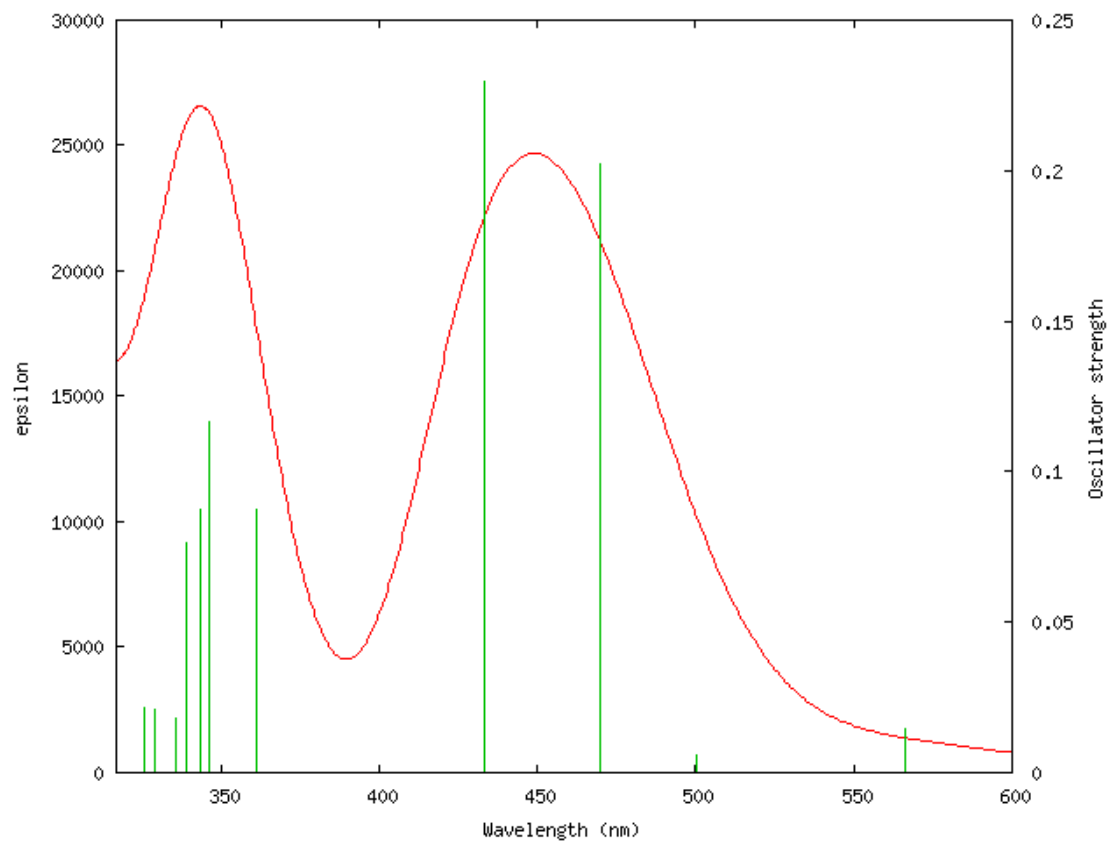

**Fig. S7** The simulated absorption spectra of complex  $[\text{Re}(\text{PAN})(\text{CO})(\text{P-P})]$ , **3** at the TDDFT (B3LYP)/LANL2DZ level in acetonitrile media.

**Table S5** Frontier Molecular Orbital Compositions (%) in the Excited State for  $[\text{Re}_2(\text{PAN})_2(\text{CO})_6]$ , **2**.

| Orbital | Energy (eV) | Contribution (%) |      |      | Main bond type                     |
|---------|-------------|------------------|------|------|------------------------------------|
|         |             | Re               | CO   | PAN  |                                    |
| 196     | -0.853      | 14.4             | 66.3 | 19.2 | p(Re)+ $\pi^*$ (CO)+ $\pi^*$ (PAN) |
| 195     | -1.029      | 9.7              | 28.0 | 62.3 | $\pi^*$ (CO)+ $\pi^*$ (PAN)        |
| 194     | -1.044      | 12.4             | 38.4 | 49.1 | p(Re)+ $\pi^*$ (CO)+ $\pi^*$ (PAN) |
| 193     | -1.075      | 12.3             | 35.1 | 52.5 | p(Re)+ $\pi^*$ (CO)+ $\pi^*$ (PAN) |
| 192     | -1.203      | 11.3             | 30.7 | 58.0 | p(Re)+ $\pi^*$ (CO)+ $\pi^*$ (PAN) |
| 191     | -1.206      | 8.3              | 26.7 | 65.0 | $\pi^*$ (CO)+ $\pi^*$ (PAN)        |
| 190     | -1.662      | 3.5              | 9.6  | 86.9 | $\pi^*$ (PAN)                      |
| 189     | -1.700      | 4.2              | 7.9  | 87.9 | $\pi^*$ (PAN)                      |
| 188     | -4.229      | 4.5              | 4.7  | 90.8 | $\pi$ (PAN)                        |
| 187     | -4.401      | 1.7              | 2.8  | 95.5 | $\pi$ (PAN)                        |

**Table S6** Calculated Triplet Excited State of Complex  $[\text{Re}_2(\text{PAN})_2(\text{CO})_6]$ , **2** in Acetonitrile Based on the Lowest Lying Triplet State Geometry. Main Calculated Vertical Transitions with Compositions in Terms of Molecular Orbital Contribution of the Transition, Vertical Excitation Energies and Oscillator Strength

| Excitation | Composition     | Energy (eV) | Oscillator Strength (f) | $\lambda_{\text{cal}}$ (nm) | Character                                               | $\lambda_{\text{exp}}$ (nm) |
|------------|-----------------|-------------|-------------------------|-----------------------------|---------------------------------------------------------|-----------------------------|
| 1          | 189 → 187 (15%) | 2.0277      | 0.0422                  | 611.44                      | <sup>3</sup> ILCT                                       | 570                         |
|            | 191 → 187 (9%)  |             |                         |                             | <sup>3</sup> LLCT/ <sup>3</sup> ILCT                    |                             |
|            | 190 → 188 (75%) |             |                         |                             | <sup>3</sup> ILCT                                       |                             |
| 2          | 190 → 187 (57%) | 2.1235      | 0.0321                  | 583.88                      | <sup>3</sup> ILCT                                       |                             |
|            | 190 → 188 (22%) |             |                         |                             | <sup>3</sup> ILCT                                       |                             |
|            | 196 → 188 (21%) |             |                         |                             | <sup>3</sup> MLCT/ <sup>3</sup> LLCT/ <sup>3</sup> ILCT |                             |
| 3          | 189 → 187 (59%) | 2.1846      | 0.0834                  | 567.54                      | <sup>3</sup> ILCT                                       |                             |
|            | 191 → 187 (7%)  |             |                         |                             | <sup>3</sup> LLCT/ <sup>3</sup> ILCT                    |                             |
|            | 190 → 188 (10%) |             |                         |                             | <sup>3</sup> ILCT                                       |                             |
|            | 192 → 188 (14%) |             |                         |                             | <sup>3</sup> MLCT/ <sup>3</sup> LLCT/ <sup>3</sup> ILCT |                             |
|            | 194 → 188 (9%)  |             |                         |                             | <sup>3</sup> MLCT/ <sup>3</sup> LLCT/ <sup>3</sup> ILCT |                             |
| 4          | 189 → 187 (11%) | 2.3017      | 0.0651                  | 538.66                      | <sup>3</sup> ILCT                                       |                             |
|            | 193 → 187 (19%) |             |                         |                             | <sup>3</sup> MLCT/ <sup>3</sup> LLCT/ <sup>3</sup> ILCT |                             |
|            | 195 → 187 (12%) |             |                         |                             | <sup>3</sup> MLCT/ <sup>3</sup> LLCT/ <sup>3</sup> ILCT |                             |
|            | 192 → 188 (48%) |             |                         |                             | <sup>3</sup> MLCT/ <sup>3</sup> LLCT/ <sup>3</sup> ILCT |                             |
|            | 194 → 188 (9%)  |             |                         |                             | <sup>3</sup> MLCT/ <sup>3</sup> LLCT/ <sup>3</sup> ILCT |                             |
